# Supplementary material
Source: PubMed Central journal article supplement (PMC3831945)
Supplement: 1313658110_pnas.201313658SI.pdf [file 1313658110_pnas.201313658SI.pdf]

# Supporting Information

Farrow et al. 10.1073/pnas.1313658110

## SI Methods

### Oligos Used for RT-PCR.

NOX1f: 5' GGC ACA GGC CAA TGT TGA CCC A 3'

NOX1r: 5' AGG CTC ACA GAC CCT GCG CT 3'

NOX2f: 5' TCA GGG GTT CCA GTG CGT GCT 3'

NOX2r: 5' GCC AAC AGG GTC ACA GCC AGG 3'

NOX3f: 5' ATG CAA CCA TCC ACA TCG TG 3'

NOX3r: 5' TCG AAC AAT CCG ACC CGT CCC A 3'

NOX4f: 5' TCT GGC TCT CCA TGA ATG TC 3'

NOX4r: 5' AGC CAC ATG CAC GCC TGA GA 3'

NOX5f: 5' AGT GGG CAG CGC TGA TGG TC 3'

NOX5r: 5' CGG TCG CAT GGC AGA GTG CT 3'

p22phoxf: 5' TCC AGT GCG TGC TGC TCA ACA A 3'

p22phoxr: 5' TCT GCG GTC TGC CCA CGT AC 3'

GAPDHf: 5' CGC GGG GCT CTC CAG AAC ATC 3'

GAPD Hr: 5' TGG TGG TCC AGG GGT CTT ACT CC 3'

**Staining and Scoring of Colonic Explants.** Tissue slated for H&E staining was fixed with 10% neutral buffered formalin for 48 h,

washed with PBS, and mounted in cassettes. Blocks were dehydrated and embedded in paraffin, and sections were cut and stained with H&E by the Translational Pathology Shared Resource Core. The sections were coded and evaluated in a blinded fashion using a semiquantitative injury scale: 0, no damage; 1, superficial damage (damage limited to intact surface epithelial cells); 2, loss of up to 50% of surface epithelial cells with gland length, crypts intact; and 3, loss of >50% of surface epithelial cells and damage in >50% of gland length. An injury score was calculated as the mean score for sections evaluated independently by five individuals.

For keratin staining, antigen retrieval was achieved by deparaffinization with Histo-clear (National Diagnostics), and antigens were retrieved by citric acid. The sections were blocked with Serum-Free Protein Block (Dako), stained with a rabbit anti-pan cytokeratin antibody (sc-15367; Santa Cruz Biotechnology), and diluted in Dako antigen diluent with background reducing components overnight at 4 °C. The sections were washed with PBS and incubated for 1 h at room temperature with Alexa Fluor 546 donkey anti-rabbit antibody (A10040; Life Technologies). The sections were washed with PBS and mounted with Prolong Gold with DAPI (P36931; Life Technologies). H&E- and pan-cytokeratin-stained sections were imaged with the Ariol SL-50 system (Applied Imaging) at the Epithelial Biology Center Imaging Core.
